# Supplementary material for: LCK as a Potential Therapeutic Target for Acute Rejection after Kidney Transplantation: A Bioinformatics Clue
Source: J Immunol Res. 2018 Jun 7;2018:6451298. doi: 10.1155/2018/6451298 (PMC6011083; doi:10.1155/2018/6451298)
Supplement: Supplementary Materials — Supplementary 1: R codes of differentially expressed genes. Supplementary 2: results of molecular function analysis. Twenty-seven terms were selected according to P < 0.01 and count ≥ 5. Supplementary 3: results of biological process analysis. Ninety-four categories were selected according to P < 0.01 and count ≥ 5. Supplementary 4: results of cellular component analysis. Twenty-one categories were selected according to P < 0.01 and count ≥ 5. Supplementary 5: results of pathway analysis. Twenty-three pathways were selected according to P < 0.01 and count ≥ 5. [file 6451298.f1.xlsx]

## Sheet: Suppl.1
R codes of differentially expressed genes.
library(affy) library(limma) ##import phenotype data phenoData = read.AnnotatedDataFrame('target.txt') pheno = pData(phenoData) View(pheno) #import Annotaion anno = read.csv("Annotation.csv",head=T) View(head(anno)) ##RMA normalization #eset.rma = RMA(Data) eset.rma <- justRMA(filenames=paste(rownames(pheno),'.CEL',sep=''), celfile.path='./GSE75693') datExpr = exprs(eset.rma) #Missing values fill…

## Sheet: Suppl.2
Results of molecular function analysis
ID	Term	-LOG(P)	Count	%	PValue	Genes
GO:0003823	Antigen binding	9.16472	22	2.69608	6.84354e-10	IGHG1, PPP2R1A, IGHG3, IGHV3-48, IGKV1-17, TRDC, ITGA4, IL7R, IGHM, SLAMF1, IGLV3-1, CD48, LILRA1, IGHD, IGHV3-23, IGHA1, IGKV4-1, IGHA2, IGKV2D-28, IGLV3-25, IGKC, IGLL5
GO:0030246	Carbohydrate binding	5.9044	25	3.06373	1.24624e-06	KLRC2, KLRC3, KLRK1, CD69, FCN1, CLEC4A, CLEC2D, CLEC4C, KLRD1, KLRB1, SELL, EPM2A, SIGLEC10, SIGLEC1, CLEC12A, CLECL1, CLEC3B, CD33, CD209, FREM1, SIGLEC7, KLRC4-KLRK1, VCAN, CLEC7A, KLRC1
GO:0004872	Receptor activity	5.63312	26	3.18627	2.32743e-06	CD244, KLRK1, CXCR3, TLR8, CD48, FOLR1, IL10RA, CD2, CSF2RB, CSF2RA, CRTAM, IL18RAP, CD160, TNFRSF17, SLAMF1, CD180, CD1D, TIGIT, TNFRSF9, LILRB2, CD86, CD33, SIGLEC7, KLRC4-KLRK1, ANXA2R, UNC13B
GO:0008009	Chemokine activity	5.52173	12	1.47059	3.00795e-06	CCL3, CXCL13, CCL3L1, CCL3L3, CXCL9, CCL5, CXCL11, XCL1, CCL4, XCL2, CCL18, CXCL10
GO:0046934	Phosphatidylinositol-4,5-bisphosphate 3-kinase activity	5.24966	13	1.59314	5.62785e-06	PIK3CG, FGFR2, CD86, FGFR3, FGF9, ERBB2, LCK, PIK3R5, EGF, IRS1, VAV1, TRAT1, CD28
GO:0034987	Immunoglobulin receptor binding	6.34975	10	1.22549	4.46936e-07	IGHG1, IGHG3, IGHD, IGHV3-23, IGHA1, IGHA2, TRDC, IGKC, IGHM, IGLL5
GO:0019864	IgG binding	4.40407	6	0.735294	3.94394e-05	FCGR1A, FCGR1B, FCER1G, UMOD, FCGR3A, FCGR3B
GO:0042803	Protein homodimerization activity	4.31482	53	6.4951	4.84368e-05	CD8A, HIP1R, VAPB, PSPH, UXS1, GSTM3, GSTM4, PLOD1, TRIM8, PVALB, CAT, SLC4A1, TOP2A, GHR, CRTAM, PDXK, GZMA, BCL2A1, DMRT2, COQ9, PFKM, LILRB1, JUP, C1QB, CHMP1A, CCR2, VEGFA, ATPIF1, IL12B, CARM1, FGFR2, STK10, KLRK1, GIPC1, CCL5, BANF1, OXCT1, BCL11A, CD2, SHMT1, IKZF3, PLEK, EPHX2, CENPF, BIRC5, STAT1, TIGIT, P2RX7, CORO1A, S100B, ID1, KLRC4-KLRK1, XCL1
GO:0004888	Transmembrane signaling receptor activity	4.25937	23	2.81863	5.5034e-05	KLRB1, EBP, KLRC2, KLRC3, CD3G, IL27RA, CD3D, CD3E, ERBB2, TRGC2, NFAM1, SLAMF1, P2RX5, IGSF6, LILRA1, EVI2A, CD69, CLEC2D, CLEC4A, CD79A, KLRD1, KLRC1, CD27
GO:0042288	MHC class I protein binding	4.1409	7	0.857843	7.22941e-05	LILRB1, LILRB2, CD244, CD8A, CD8B, KLRK1, KLRC4-KLRK1
GO:0015026	Coreceptor activity	3.82105	8	0.980392	0.000150992	CD86, CCR5, CD8A, CXCR4, CD8B, CXCR6, ITGA4, CD28
GO:0004896	Cytokine receptor activity	3.29941	8	0.980392	0.00050187	IL12RB1, CD44, CSF2RB, IL2RG, IL12B, IL7R, CSF2RA, GHR
GO:0004252	Serine-type endopeptidase activity	3.17647	23	2.81863	0.000666082	F11, IGHG1, TMPRSS2, IGHG3, GZMA, IGHV3-48, IGKV1-17, GZMB, CTSS, GZMH, IGLV3-1, RHBDD2, PRSS8, C1QB, GZMK, IGHV3-23, FCN1, IGKV4-1, IGKV2D-28, IGLV3-25, C2, IGKC, MST1L
GO:0016175	Superoxide-generating NADPH oxidase activity	3.16333	5	0.612745	0.000686546	CYBB, NCF2, NCF1, NCF1C, NCF1B
GO:0008201	Heparin binding	3.1265	17	2.08333	0.000747311	KNG1, F11, FGFR2, LPL, SELL, FGF9, ADAMTS15, CXCL11, APLP2, CXCL10, CLEC3B, CXCL13, SERPINA5, VEGFA, LIPH, HRG, PLA2G2D
GO:0043548	Phosphatidylinositol 3-kinase binding	3.11989	6	0.735294	0.000758777	CORO1A, LCK, ATP1A1, IRS1, INSR, HCST
GO:0042169	SH2 domain binding	3.04698	7	0.857843	0.000897464	LILRB1, SIT1, LAX1, LCK, AFAP1L2, IRS1, PAG1
GO:0048020	CCR chemokine receptor binding	2.71639	6	0.735294	0.00192136	CCRL2, CCL3L1, CCL3L3, XCL1, XCL2, CCL18
GO:0004869	Cysteine-type endopeptidase inhibitor activity	2.6692	7	0.857843	0.00214189	KNG1, CARD16, CST7, HRG, BIRC5, PTTG1, CSTA
GO:0032395	MHC class II receptor activity	2.60262	5	0.612745	0.00249678	HLA-DQB1, HLA-DQB2, HLA-DPA1, HLA-DOB, HLA-DQA1
GO:0043325	Phosphatidylinositol-3,4-bisphosphate binding	2.54692	6	0.735294	0.00283847	PLEK, DAPP1, NCF1, HIP1R, NCF1C, NCF1B
GO:0004950	Chemokine receptor activity	2.38901	5	0.612745	0.00408314	CCRL2, CCR5, CCR2, ACKR4, CXCR3
GO:0005102	Receptor binding	2.33683	26	3.18627	0.00460439	FASLG, GIPC1, TESPA1, IL17RA, BTK, CXCL10, CD2, HRG, CAT, SELPLG, KNG1, FYB, LPL, ITK, CRTAM, TMC8, HCK, EPHX2, CD160, TNFSF8, HCST, TIGIT, P2RX7, CD86, TNFSF13B, CROT
GO:0042605	Peptide antigen binding	2.32301	6	0.735294	0.00475326	HLA-DQB1, TRGV9, CD209, HLA-DPA1, HLA-DQA1, DHCR24
GO:0005164	Tumor necrosis factor receptor binding	2.25519	6	0.735294	0.00555656	TNF, TNFSF11, TNFSF13B, FASLG, STAT1, TNFSF8
GO:0005088	Ras guanyl-nucleotide exchange factor activity	2.17481	12	1.47059	0.00668643	FGFR2, LAT, IL2RB, FGFR3, IL2RA, FGF9, ERBB2, CSF2RB, IL2RG, EGF, IRS1, CSF2RA
GO:0004713	Protein tyrosine kinase activity	2.12555	13	1.59314	0.00748942	FGFR2, FGFR3, FLT1, FGF9, HCK, MAP2K3, ERBB2, LCK, CSF2RB, EGF, INSR, CSF2RA, BTK

## Sheet: Suppl.3
Results of biological process analysis
ID	Term	-LOG(P)	Count	%	PValue	Genes
GO:0006955	Immune response	32.8035	83	10.1716	1.57231e-33	IL27RA, IL16, CD8A, CD8B, IGHV3-48, IGKV1-17, TRGC2, FASLG, CXCL11, CXCL10, B2M, CFP, CD96, IFNG, IL1B, IGKV2D-28, FCGR3A, FCGR3B, IL18RAP, GZMA, NCF4, ACKR4, IL24, CTSS, TRBC1, GZMH, WAS, HLA-DQA1, CTSW, IGSF6, SERPINB9, TNFRSF9, LILRB2, CCR7, CD86, TNFSF13B, CCR5, CST7, LAX1, IGHD, CCR2, IGKV4-1, HLA-DPA1, IGLV3-25, GBP2, PTAFR, LCP2, HLA-DQB1, HLA-DQB2, GPR183, CCL3, TNF, LST1, CXCL9, GPR65, C…
GO:0002250	Adaptive immune response	25.5987	45	5.51471	2.51964e-26	GPR183, CD244, CD8B, KLRK1, IGHM, BTK, RNF125, SH2D1A, LILRA1, ZNF683, LILRA4, TAP2, FCGR1B, IFNG, CLEC4A, CLEC4C, CD6, PAG1, PIK3CG, ITK, LAIR1, CRTAM, SIT1, THEMIS, CD1C, EOMES, CTLA4, TNFRSF17, CTSS, SLAMF7, CD1E, TRAT1, PRKCB, CD84, BTLA, LILRB1, LAT, LILRB2, IGKV2-28, CD86, LAX1, CD209, KLRC4-KLRK1, CD79A, PRDM1
GO:0050776	Regulation of immune response	22.9326	46	5.63725	1.16785e-23	ITGAL, CD8A, IGHV3-48, CD8B, IGKV1-17, KLRK1, B2M, CD96, SH2D1A, LILRA1, FCGR1A, IGHV3-23, CLEC2D, IGKV2D-28, FCGR3A, IGKC, KLRD1, KLRB1, LAIR1, CRTAM, CD3G, CD3D, CD3E, SELL, LAIR2, SLA2, CD1C, SLAMF6, CD160, ITGA4, SLAMF7, TRBC1, CD1D, IGLV3-1, HCST, LILRB1, LILRB2, CD300A, CD33, SIGLEC7, IRF1, KLRC4-KLRK1, CD300LF, IGKV4-1, IGLV3-25, KLRC1
GO:0006954	Inflammatory response	16.5889	57	6.98529	2.57681e-17	TOLLIP, LY86, CXCR3, CXCL11, TLR8, CXCL10, CCRL2, CXCR4, CCL3L1, AOAH, CCL3L3, CXCR6, IL1B, KNG1, PIK3CG, PTGER3, IL18RAP, ADGRE2, GBP5, LYZ, NFAM1, IL24, SIGLEC1, TNFRSF9, CCR7, SDC1, CCR5, CCR2, PTGDR, TNFAIP3, PLA2G2D, PTAFR, CAMK1D, ITGAL, CCL3, TNF, CXCL9, AFAP1L2, FPR3, CCL5, CCL4, CD27, IL2RA, HCK, EPHX2, CD5L, CD180, AIM2, CCL18, LAT, P2RX7, CYBB, CXCL13, CLEC7A, BMPR1B, XCL2, THEMIS2
GO:0050853	B cell receptor signaling pathway	15.2079	22	2.69608	6.19585e-16	IGHG1, PTPRC, IGHG3, CTLA4, NCKAP1L, TRDC, NFAM1, IGHM, PRKCB, BTK, CD38, KLHL6, IGHD, LCK, IGHV3-23, MNDA, IGHA1, IGHA2, CD79A, IGKC, NFATC2, IGLL5
GO:0045087	Innate immune response	11.2312	52	6.37255	5.87161e-12	IGHG1, KLRC2, IGHG3, TOLLIP, LY86, LY9, IGHM, TLR8, B2M, BTK, NLRC5, NOD2, SH2D1A, TRIM8, TKFC, ZNF683, PCBP2, CLEC4A, CLEC4C, IGLL5, KLRD1, PIK3CG, NCF2, NCF1, CD84, C1QB, IGHD, LCK, PRDM1, TNFAIP8L2, CD244, KLRK1, TRDC, IGHV3-23, IGHA1, FCER1G, IGHA2, C2, IGKC, CD6, ITK, SLAMF6, SLAMF1, CD180, AIM2, CD1D, CORO1A, CYBB, S100B, CD209, KLRC4-KLRK1, CLEC7A
GO:0007166	Cell surface receptor signaling pathway	11.1005	40	4.90196	7.93455e-12	ADGRF1, IL27RA, CYSLTR1, CD8A, ERBB2, ADGRF5, TSPAN7, CD53, CXCR3, IL7R, IL17RA, CXCL10, TSPAN12, LILRA1, BAG1, TSPAN33, IFNG, CLEC2D, CD2, CLEC4A, KLRD1, CD27, CD28, KLRB1, PTPRC, CD3G, ADGRE2, IL18RAP, IL2RA, CD3D, CD3E, CD160, BIRC3, IGSF6, LILRB2, P2RX7, CD37, CCR5, CXCL13, KLRC1
GO:0006968	Cellular defense response	10.6006	19	2.32843	2.50864e-11	PRF1, ITK, KLRC2, KLRC3, NCF2, NCF1, GNLY, CXCL9, CD160, UMOD, CD5L, TRAT1, LSP1, LILRB2, SH2D1A, CCR5, FCMR, CCR2, MNDA
GO:0070098	Chemokine-mediated signaling pathway	9.52406	19	2.32843	2.99182e-10	CCL3, CXCL9, CXCR3, ACKR4, CXCL11, CCL5, CCL4, CCL18, CXCL10, CCRL2, CCR5, CXCR4, CXCL13, CCL3L1, CCR2, CCL3L3, CXCR6, XCL1, XCL2
GO:0042110	T cell activation	8.54246	15	1.83824	2.86771e-09	PIK3CG, ITK, CD3G, CD8A, CD8B, CD3E, SLA2, WAS, ADA, CD48, LAT, CD86, NLRC3, CD2, CLEC7A
GO:0006935	Chemotaxis	8.44222	23	2.81863	3.61229e-09	CCL3, RNASE2, CYSLTR1, CXCL9, NCKAP1L, CXCR3, ACKR4, CXCL11, CCL5, CCL18, CXCL10, CCRL2, LSP1, DOCK2, CCR7, RAC2, CCR5, CXCR4, CCR2, CXCR6, HRG, CMTM4, PTAFR
GO:0006910	Phagocytosis, recognition	8.28157	12	1.47059	5.22913e-09	IGHG1, TUB, IGHG3, IGHD, IGHV3-23, IGHA1, IGHA2, CLEC7A, TRDC, IGKC, IGHM, IGLL5
GO:0006911	Phagocytosis, engulfment	8.18933	13	1.59314	6.46655e-09	IGHG1, IGHG3, TRDC, IGHM, IGHD, FCGR1A, IGHV3-23, IGHA1, FCER1G, IGHA2, IGKC, BIN2, IGLL5
GO:0031295	T cell costimulation	7.94737	18	2.20588	1.12882e-08	HLA-DQB1, HLA-DQB2, CD3G, CD3D, CD3E, CTLA4, KLRK1, TRBC1, VAV1, HLA-DQA1, BTLA, CD86, TNFSF13B, ICOS, LCK, KLRC4-KLRK1, HLA-DPA1, CD28
GO:0007588	Excretion	7.87545	13	1.59314	1.33215e-08	CLCNKA, CLCNKB, UMOD, AQP6, AQP3, AQP2, KCNJ1, SCNN1G, NEDD4L, ATP6V0A4, SCNN1B, UNC13B, CLCN5
GO:0050852	T cell receptor signaling pathway	7.51759	24	2.94118	3.03678e-08	HLA-DQB1, FYB, PTPRC, HLA-DQB2, ITK, CD3G, CD3D, THEMIS, CD3E, PTPN22, TRBC1, WAS, HLA-DQA1, TRAT1, PSMB9, LAT, LCK, IFNG, HLA-DPA1, PSMD4, THEMIS2, PAG1, CD28, LCP2
GO:0050871	Positive regulation of B cell activation	7.47271	11	1.34804	3.36735e-08	IGHG1, IGHG3, NOD2, IGHD, IGHV3-23, IGHA1, IGHA2, TRDC, IGKC, IGHM, IGLL5
GO:0042102	Positive regulation of T cell proliferation	7.04951	15	1.83824	8.92256e-08	PTPRC, CD3E, NCKAP1L, CCL5, CD1D, LILRB2, CORO1A, TNFSF13B, IFNG, IL1B, HLA-DPA1, IL12B, CD6, SASH3, CD28
GO:0060333	Interferon-gamma-mediated signaling pathway	6.89409	16	1.96078	1.27617e-07	HLA-DQB1, HLA-DQB2, HCK, STAT1, HLA-DQA1, B2M, CD44, TRIM8, FCGR1A, IFNG, FCGR1B, IRF1, HLA-DPA1, GBP2, PTAFR, GBP1
GO:0006958	Complement activation, classical pathway	6.34883	18	2.20588	4.47889e-07	IGHG1, IGHG3, IGHV3-48, IGKV1-17, TRDC, IGHM, IGLV3-1, C1QB, IGHD, IGHV3-23, IGHA1, IGKV4-1, IGHA2, IGKV2D-28, IGLV3-25, C2, IGKC, IGLL5
GO:0038096	Fc-gamma receptor signaling pathway involved in phagocytosis	6.05855	20	2.45098	8.73867e-07	IGHG1, IGHG3, CD3G, IGHV3-48, IGKV1-17, HCK, NCKAP1L, WAS, VAV1, IGLV3-1, FCGR1A, IGHV3-23, CYFIP2, IGKV4-1, IGKV2D-28, IGLV3-25, WASL, WIPF1, FCGR3A, IGKC
GO:0032729	Positive regulation of interferon-gamma production	5.77848	12	1.47059	1.66542e-06	TNF, IL12RB1, IL27RA, CD3E, CCR2, KLRK1, KLRC4-KLRK1, SLAMF6, IL1B, HLA-DPA1, IL12B, SASH3
GO:0030593	Neutrophil chemotaxis	5.68914	14	1.71569	2.0458e-06	PIK3CG, CCL3, NCKAP1L, CCL5, VAV1, CCL4, CCL18, CCL3L1, CCL3L3, IFNG, IL1B, FCER1G, XCL1, XCL2
GO:0007165	Signal transduction	5.68253	81	9.92647	2.07715e-06	KLRC2, KLRC3, SLC44A2, FGF9, TOLLIP, TRGC2, FASLG, CD53, CXCL11, PLPPR1, CXCL10, CD48, ACVR1B, EVI2A, PPP1R1A, IL1B, CSF2RB, CASP1, PAG1, ARHGAP9, SIT1, TNFRSF17, CLIC2, NFAM1, ARHGAP24, IRS1, TRAT1, ARHGAP25, PRKCB, ARHGAP30, JUP, LILRB1, LILRB2, CD38, TNFSF13B, CD33, UNC13B, SH3GL2, ITGAL, CD244, ERBB2, CXCL9, KLRK1, FPR3, IL7R, CCL4, APBB1IP, TAGAP, TMED4, IL12RB1, DAPP1, RAC2, SLC35B2, CD69, …
GO:0071346	Cellular response to interferon-gamma	5.61757	13	1.59314	2.41227e-06	CCL3, GBP5, CCL5, CCL4, CCL18, IL12RB1, CCL3L1, CCL3L3, HLA-DPA1, IL12B, XCL1, XCL2, GAPDH
GO:0010818	T cell chemotaxis	5.25902	6	0.735294	5.5078e-06	PIK3CG, GPR183, CCL3, CXCR3, CXCL11, CXCL10
GO:0030217	T cell differentiation	4.72604	9	1.10294	1.87916e-05	PTPRC, CD3D, GPR18, TBX21, LCK, PTPN22, IL7R, VAV1, RHOH
GO:0050729	Positive regulation of inflammatory response	4.46078	13	1.59314	3.46117e-05	LPL, CCL3, CCL5, GPRC5B, CCL4, CCL18, CCL3L1, CCR2, CCL3L3, PLA2G7, IL12B, XCL1, XCL2
GO:0002407	Dendritic cell chemotaxis	4.43173	7	0.857843	3.70059e-05	PIK3CG, GPR183, CCR7, CCR5, CXCR4, CCR2, CCL5
GO:0002548	Monocyte chemotaxis	4.41853	10	1.22549	3.81477e-05	CCL3, FLT1, TNFSF11, CCL3L1, CCL3L3, CCL5, XCL1, CCL4, XCL2, CCL18
GO:0006956	Complement activation	4.33003	14	1.71569	4.67705e-05	IGHG1, IGHG3, IGHV3-48, IGKV1-17, IGLV3-1, CFP, C1QB, FCN1, IGHV3-23, IGKV4-1, IGKV2D-28, C2, IGLV3-25, IGKC
GO:0071222	Cellular response to lipopolysaccharide	4.28381	16	1.96078	5.20226e-05	TNF, KLRK1, IL24, PPARGC1A, CD180, CXCL10, B2M, LILRB1, LILRB2, CD86, CCR5, IFNG, KLRC4-KLRK1, GFI1, IL12B, TNFAIP3
GO:0050850	Positive regulation of calcium-mediated signaling	3.98129	7	0.857843	0.000104402	P2RX5, CCL3, CD8A, CD3E, CCL4, TRAT1, ADA
GO:0045730	Respiratory burst	3.9715	6	0.735294	0.000106782	CYBB, NCF2, NCF1, NCF1C, NCF1B, CD52
GO:0050900	Leukocyte migration	3.89849	16	1.96078	0.000126332	ITGAL, ATP1B1, CD244, SELL, FPR3, ITGA4, ITGAM, CD84, CD48, SIRPG, CD44, LCK, CD2, FCER1G, ESAM, SELPLG
GO:0050862	Positive regulation of T cell receptor signaling pathway	3.78078	5	0.612745	0.00016566	CCR7, LCK, TRAT1, TESPA1, ADA
GO:0031663	Lipopolysaccharide-mediated signaling pathway	3.61129	8	0.980392	0.000244743	CCL3, TNF, HCK, IL1B, PTPN22, CCL5, CD6, PTAFR
GO:0032733	Positive regulation of interleukin-10 production	3.61084	7	0.857843	0.000244997	TIGIT, NOD2, FCER1G, IL12B, XCL1, SASH3, CD28
GO:0007267	Cell-cell signaling	3.54081	24	2.94118	0.000287867	FGFR2, CCL3, FGFR3, FGF9, TOLLIP, CXCL9, FASLG, CXCL11, CCL5, CCL4, CCL18, CXCL10, TNFSF8, LILRB2, CD86, SH2D1A, SIRPG, CCR5, CXCL13, CD33, PKP4, IL1B, SEMA3B, XCL1
GO:1900017	Positive regulation of cytokine production involved in inflammatory response	3.53969	5	0.612745	0.000288607	NOD2, GBP5, GPSM3, CD6, IL17RA
GO:0006952	Defense response	3.45659	11	1.34804	0.00034947	CD84, CD48, NOD2, LILRA1, CYSLTR1, CXCL9, HCP5, PTPRCAP, WAS, MLF2, SP140
GO:0048015	Phosphatidylinositol-mediated signaling	3.44464	14	1.71569	0.000359223	PIK3CG, FGFR2, FGFR3, FGF9, ERBB2, NCS1, VAV1, IRS1, TRAT1, CD86, LCK, EGF, PTAFR, CD28
GO:0046854	Phosphatidylinositol phosphorylation	3.38332	13	1.59314	0.000413695	PIK3CG, FGFR2, CD86, FGFR3, FGF9, ERBB2, LCK, PIK3R5, EGF, IRS1, VAV1, TRAT1, CD28
GO:0006959	Humoral immune response	3.34952	10	1.22549	0.000447179	GPI, GPR183, POU2AF1, SH2D1A, TNF, LY86, POU2F2, IFNG, MS4A1, CD28
GO:0007169	Transmembrane receptor protein tyrosine kinase signaling pathway	3.29868	13	1.59314	0.000502715	ITK, FLT1, CD8A, CD8B, CD3E, ERBB2, HCK, TRAT1, BTK, LCK, INSR, PAG1, LCP2
GO:0006915	Apoptotic process	3.29695	41	5.02451	0.000504714	FGFR2, PRF1, MRPL41, HIP1R, LY86, GPR65, STK17B, FASLG, CXCR3, BAG1, CXCR4, IFNG, CD2, IL1B, TRAF7, DAP, CASP1, DHCR24, PPP2R1A, IL2RA, NCF1, GZMA, MZB1, GZMB, BIRC5, CD5L, IL24, STAT1, GZMH, BIRC3, AIM2, PRKCB, TNFSF8, SERPINB9, TNFRSF9, DNASE1, RASSF5, CYFIP2, IRF1, TNFAIP3, UNC13B
GO:0006898	Receptor-mediated endocytosis	3.23199	19	2.32843	0.000586147	TMPRSS2, IGHV3-48, HIP1R, IGKV1-17, CD5L, ACKR4, CD163, IGLV3-1, FOLR1, FCGR1A, FCGR1B, IGHV3-23, IGHA1, IGKV4-1, IGHA2, IGKV2D-28, IGLV3-25, IGKC, CD6
GO:0045954	Positive regulation of natural killer cell mediated cytotoxicity	3.2217	6	0.735294	0.000600212	CRTAM, SH2D1A, KLRK1, KLRC4-KLRK1, SLAMF6, VAV1
GO:0050868	Negative regulation of T cell activation	3.14986	5	0.612745	0.000708176	TIGIT, TNFAIP8L2, LAX1, PTPN22, PAG1
GO:0050690	Regulation of defense response to virus by virus	3.11408	7	0.857843	0.000768991	DOCK2, CD8B, HCK, LCK, AP2M1, CD28, B2M
GO:0070374	Positive regulation of ERK1 and ERK2 cascade	3.10287	18	2.20588	0.000789104	FGFR2, GPR183, CCL3, TNF, FGFR3, PTPN22, CCL5, CCL4, SLAMF1, CCL18, NOD2, CCR7, CD44, CCL3L1, CCL3L3, VEGFA, XCL1, XCL2
GO:0043123	Positive regulation of I-kappaB kinase/NF-kappaB signaling	3.05952	17	2.08333	0.000871925	TNF, SLC44A2, FASLG, PINK1, WLS, BIRC3, GPRC5B, PRKCB, NOD2, CCR7, TMED4, TNFSF11, TRIM8, S100B, SLC35B2, UBD, CASP1
GO:0030890	Positive regulation of B cell proliferation	3.0585	8	0.980392	0.000873974	PTPRC, CD38, GPR183, TNFSF13B, NCKAP1L, NFATC2, SASH3, ADA
GO:0050766	Positive regulation of phagocytosis	3.02841	7	0.857843	0.000936679	TUB, DOCK2, TNF, FCER1G, IL1B, CAMK1D, RAB27A
GO:0019722	Calcium-mediated signaling	3.01598	9	1.10294	0.00096387	LAT, CCL3, TNFSF11, NUDT4, CCR5, CXCR4, CXCR3, RCAN2, BTK
GO:0030101	Natural killer cell activation	2.99342	6	0.735294	0.00101526	IL21R, CD2, KLRK1, KLRC4-KLRK1, SLAMF7, IL12B
GO:0000165	MAPK cascade	2.97253	23	2.81863	0.00106529	FGFR2, CCL3, IL2RB, TNF, IL2RA, FGFR3, FGF9, MAP2K3, ERBB2, CCL5, IRS1, PSMB9, LAT, CCR5, PEBP1, CSF2RB, IL1B, PPM1L, PSMD4, IL2RG, DUSP9, EGF, CSF2RA
GO:0007204	Positive regulation of cytosolic calcium ion concentration	2.95595	15	1.83824	0.00110675	KNG1, PIK3CG, PTGER3, CYSLTR1, CD52, FPR3, CXCR3, CD38, CCR7, CCR5, CXCR4, CXCL13, CCR2, PTGDR, CACNA1A
GO:0051607	Defense response to virus	2.94546	17	2.08333	0.00113381	PRF1, PTPRC, CD8A, CXCL9, SAMHD1, STAT1, TLR8, ISG20, CXCL10, LILRB1, NLRC5, CD86, PCBP2, IFNG, IRF1, IL12B, GBP1
GO:0014066	Regulation of phosphatidylinositol 3-kinase signaling	2.9248	11	1.34804	0.00118904	FGFR2, CD86, FGFR3, FGF9, ERBB2, LCK, EGF, IRS1, VAV1, TRAT1, CD28
GO:0019835	Cytolysis	2.88994	6	0.735294	0.00128842	PRF1, P2RX7, GZMA, LYZ, GZMB, GZMH
GO:0001916	Positive regulation of T cell mediated cytotoxicity	2.84229	5	0.612745	0.00143782	P2RX7, IL12RB1, IL12B, XCL1, B2M
GO:0045088	Regulation of innate immune response	2.84229	5	0.612745	0.00143782	TKFC, IRF1, SAMHD1, PTPN22, BIRC3
GO:0050718	Positive regulation of interleukin-1 beta secretion	2.79257	6	0.735294	0.00161222	P2RX7, NOD2, CCL3, IFNG, CASP1, AIM2
GO:0071345	Cellular response to cytokine stimulus	2.79257	6	0.735294	0.00161222	CD86, CCR7, IL18RAP, CXCR4, HCLS1, ITGA4
GO:0006096	Glycolytic process	2.65124	7	0.857843	0.00223234	ALDOA, GPI, PGM1, PFKM, OGDH, PGK1, GAPDH
GO:0038095	Fc-epsilon receptor signaling pathway	2.60431	17	2.08333	0.00248709	ITK, IGHV3-48, IGKV1-17, VAV1, BTK, IGLV3-1, PSMB9, LAT, IGHV3-23, IGKV4-1, FCER1G, IGKV2D-28, PSMD4, IGLV3-25, IGKC, NFATC2, LCP2
GO:0032760	Positive regulation of tumor necrosis factor production	2.56867	8	0.980392	0.0026998	NOD2, CCL3, IFNG, CD2, FCER1G, IL12B, SASH3, PTAFR
GO:0032496	Response to lipopolysaccharide	2.54774	16	1.96078	0.00283309	CXCL9, PTPN22, FASLG, IDO1, CXCL11, CXCL10, CD96, TNFRSF9, P2RX7, CCR7, CXCL13, IL10RA, CSF2RB, CD6, CASP1, CD27
GO:0043547	Positive regulation of GTPase activity	2.52636	38	4.65686	0.00297607	FGFR2, CCL3, FGFR3, HACD3, FGF9, ERBB2, CYTH4, CCL5, CCL4, DOCK2, TAGAP, CCL3L1, CCL3L3, CSF2RB, IL2RG, EGF, CSF2RA, ARHGAP9, IL2RB, IL2RA, RGS19, NCKAP1L, ARHGAP24, VAV1, IRS1, DENND1C, FARP1, CCL18, DNMBP, ARHGAP25, ARHGAP30, LAT, RGS1, ACAP1, RGS5, PKP4, XCL1, XCL2
GO:0030949	Positive regulation of vascular endothelial growth factor receptor signaling pathway	2.47871	5	0.612745	0.00332113	FLT1, FGF9, VEGFA, IL1B, PRKCB
GO:0002479	Antigen processing and presentation of exogenous peptide antigen via MHC class I, TAP-dependent	2.41682	9	1.10294	0.00382984	CYBB, NCF2, NCF1, FCGR1A, NCF4, FCGR1B, PSMD4, PSMB9, B2M
GO:0071310	Cellular response to organic substance	2.37623	5	0.612745	0.00420505	CLEC3B, TBX21, IL1B, CUX2, CASP1
GO:0002504	Antigen processing and presentation of peptide or polysaccharide antigen via MHC class II	2.37623	5	0.612745	0.00420505	HLA-DQB1, HLA-DQB2, HLA-DPA1, HLA-DOB, HLA-DQA1
GO:0009615	Response to virus	2.29293	12	1.47059	0.00509417	LILRB1, BATF3, TNF, CXCR4, TBX21, IFNG, CCL5, XCL1, BANF1, CCL4, TLR8, ISG20
GO:0010628	Positive regulation of gene expression	2.28124	21	2.57353	0.00523306	CCL3, TNF, FGF9, CD3E, ERBB2, EPHX2, PTPN22, IL7R, MYCN, LILRB1, SERPINB9, P2RX7, ID1, ZNF683, IFNG, VEGFA, IL1B, PRDM1, CUX2, CD28, RAB27A
GO:0050870	Positive regulation of T cell activation	2.28108	5	0.612745	0.005235	SIRPG, TNFSF11, CCR2, LCK, HLA-DPA1
GO:0002690	Positive regulation of leukocyte chemotaxis	2.28108	5	0.612745	0.005235	GPSM3, CXCL9, CXCL11, XCL1, CXCL10
GO:0034220	Ion transmembrane transport	2.26454	18	2.20588	0.00543829	ATP1B1, SGK2, SLC12A1, CLCNKA, CLCNKB, ATP1A1, FXYD5, AQP3, AQP2, ATP6V1C2, NEDD4L, SCNN1G, ATP6V1G3, SCNN1B, ATP6V0A4, ATP6V0D2, FAM26F, CLCN5
GO:0042113	B cell activation	2.24022	6	0.735294	0.00575146	CD86, IKZF3, LAX1, CD79A, PRKCB, BTK
GO:0042742	Defense response to bacterium	2.2074	14	1.71569	0.00620298	IGHG1, CFP, IGHG3, NOD2, CXCL13, GNLY, IGHD, IGHV3-23, IFNG, FCER1G, TRDC, IGKC, IGLL5, PLAC8
GO:0045672	Positive regulation of osteoclast differentiation	2.1924	5	0.612745	0.00642099	TNF, TNFSF11, IFNG, IL12B, CA2
GO:0019882	Antigen processing and presentation	2.18099	8	0.980392	0.00659186	HLA-DQB1, CD8A, CD209, IFNG, HLA-DPA1, CTSS, HLA-DQA1, RAB27A
GO:0051897	Positive regulation of protein kinase B signaling	2.15786	10	1.22549	0.00695246	PIK3CG, CCL3, CCR7, TNF, TNFSF11, HCLS1, PINK1, PIK3R5, INSR, CD28
GO:0045785	Positive regulation of cell adhesion	2.12868	7	0.857843	0.00743564	CCR7, TNF, ERBB2, VEGFA, IL12B, CCL5, APBB1IP
GO:0006508	Proteolysis	2.12286	33	4.04412	0.00753593	IGHG1, ERMP1, IGHG3, IGHV3-48, IGKV1-17, ADAMTS15, PRSS8, PGPEP1, IGHV3-23, FCN1, STAMBPL1, CPA3, IGKV2D-28, FBXO3, C2, IGKC, CASP1, DPEP2, F11, TMPRSS2, CTSS, RHBDD2, IGLV3-1, C1QB, GZMK, GGT6, CHMP1A, BACE2, IGKV4-1, UBD, IGLV3-25, MST1L, ADAMDEC1
GO:0006461	Protein complex assembly	2.12154	12	1.47059	0.00755896	PARD6B, PPP2R1A, IL2RB, CD3G, CD3E, NCKAP1L, WIPF1, WASL, VAMP2, ATPAF1, PPARGC1A, WAS
GO:0006801	Superoxide metabolic process	2.10944	5	0.612745	0.00777242	CYBB, NCF2, NCF1, NCF1C, NCF1B
GO:0033209	Tumor necrosis factor-mediated signaling pathway	2.06754	12	1.47059	0.00855968	TNFRSF9, TNF, TNFSF11, TNFSF13B, TNFRSF17, FASLG, PSMD4, BIRC3, STAT1, CD27, AIM2, PSMB9
GO:0048010	Vascular endothelial growth factor receptor signaling pathway	2.06457	9	1.10294	0.00861838	CYBB, FLT1, NCF2, NCF1, NCF4, VEGFA, CYFIP2, NCKAP1L, VAV1
GO:0033198	Response to ATP	2.03161	5	0.612745	0.00929807	P2RX5, P2RX7, SELL, IL1B, CASP1
GO:0045921	Positive regulation of exocytosis	2.03161	5	0.612745	0.00929807	RAB3A, CADPS2, NCS1, CFTR, RAB27A
GO:0043406	Positive regulation of MAP kinase activity	2.01565	8	0.980392	0.00964605	PIK3CG, TNF, FLT1, TNFSF11, ERBB2, VEGFA, PIK3R5, EGF
GO:0071407	Cellular response to organic cyclic compound	2.01565	8	0.980392	0.00964605	P2RY13, NOD2, CCL3, TNF, RGS19, IL1B, CCL5, STAT1

## Sheet: Suppl.4
Results of cellular component analysis
ID	Term	-LOG(P)	Count	%	PValue	Genes
GO:0009897	External side of plasma membrane	29.6601	57	6.98529	2.18727e-30	IGHG1, IGHG3, CD8A, CD8B, FASLG, CXCR3, IGHM, B2M, CXCL10, CD48, SERPINA5, IFNG, MS4A1, FCGR3A, KLRD1, IGLL5, CD3E, LILRB1, TNFRSF9, CCR7, CD86, SDC1, CCR5, CD33, IGHD, CD244, TNF, KLRK1, CXCL9, TRDC, IL7R, KCNJ3, ADA, IL12RB1, CD69, ICOS, IGHV3-23, CD2, IGHA1, FCER1G, IGHA2, IL2RG, SCNN1G, SCNN1B, IGKC, CD27, CD28, PTPRC, IL2RB, IL2RA, SELL, CTLA4, SLAMF1, CLPTM1, P2RX7, KLRC4-KLRK1, CD79A
GO:0005886	Plasma membrane	16.4752	263	32.2304	3.34839e-17	ATP1B1, KLRC2, ADORA3, ADCY7, SLC9A3, PVRIG, CD53, IGHM, AQP3, BTK, B2M, AQP2, CD48, ADTRP, LILRA1, CD44, CLEC4A, GNG2, CLEC4C, MUC15, KLRD1, PIK3CG, KLRB1, F11, CRTAM, CD3G, CD3D, CD3E, HLA-DQA1, LILRB1, JUP, LILRB2, CD38, CCR7, SIRPG, CCR5, CD33, IGHD, CCR2, RAB17, IGKV4-1, HLA-DPA1, IGLV3-25, ATP6V1G3, UNC13B, SH3GL2, KLRC1, ERBB2, STK17B, AFAP1L2, KCNJ3, ADA, KCNJ1, RAC2, IGHV3-23, FCER1G, EM…
GO:0005887	Integral component of plasma membrane	15.5733	123	15.0735	2.67143e-16	KLRC2, KIAA1324, TRGC2, TSPAN7, CD52, CD53, AQP6, PLPPR1, AQP3, IL17RA, AQP2, CD48, CD44, CLEC4A, MS4A1, SLC4A1, INSR, PAG1, CRTAM, CD3G, CD3E, HLA-DQA1, TRAT1, IGSF6, LILRB2, CD37, CCR5, CD33, CCR2, HLA-DPA1, VAMP2, KLRC1, FGFR2, FGFR3, CYSLTR1, KLRK1, FXYD5, LAPTM5, CD69, FOLR1, ICOS, FCER1G, EMB, SLC6A13, NCKAP1L, TIGIT, P2RX5, P2RX7, TNFSF11, SEMA6D, KLRC4-KLRK1, CD79A, NKG7, CLCN5, IL27RA, C…
GO:0070062	Extracellular exosome	10.89	182	22.3039	1.2881e-11	ATP1B1, ALDH1L1, SLC44A2, THRB, TUBB2A, SLC9A3, KIAA1324, SELENBP1, CD53, IGHM, UXS1, B2M, AQP2, CD48, GSTM3, CD44, PLOD1, PVALB, AIF1L, MS4A1, IL1B, GNG2, SLC4A1, INSR, IGLL5, RAB27A, F11, PDXK, GLTP, NEBL, JUP, C1QB, CD38, CD37, CDKL1, CD33, IGHD, PGM1, RAB17, MNDA, IGLV3-25, CSTA, VAMP2, TNFAIP3, SH3GL2, FAM171A1, ALDOA, ITGAL, STK10, CHCHD3, GIPC1, UMOD, BANF1, ITGAM, SIAE, DOCK2, RAC2, FOLR1…
GO:0016021	Integral component of membrane	7.60322	275	33.701	2.49331e-08	KLRC2, ADORA3, KLRC3, ADCY7, VAPB, SLC9A3, NELL2, CNPPD1, PVRIG, CD52, CD53, AQP6, IGHM, PLPPR1, UXS1, AQP3, AQP2, CD48, ADTRP, LILRA1, CD44, LILRA4, CLEC4A, CLEC4C, SCD5, C6ORF136, MUC15, KLRD1, KLRB1, CD3G, CD3D, CD3E, FAXDC2, TIMD4, DHRS7B, HLA-DQA1, GLCE, LILRB1, CD38, LILRB2, CD37, CCR7, SIRPG, CCR5, TMEM139, CD33, BACE2, IGHD, CCR2, HSD11B2, HLA-DPA1, YME1L1, KLRC1, ERMP1, ERBB2, KCNJ3, KCN…
GO:0009986	Cell surface	7.02359	50	6.12745	9.4713e-08	SLC9A3, ADGRF5, LY9, CD53, IGHM, SDC2, ACVR1B, NOD2, SLC1A3, CD44, CXCR4, GHR, CFTR, NFAM1, HCST, CD38, LILRB2, CCR7, CD86, SDC1, CCR5, BACE2, VEGFA, ATPIF1, HLA-DPA1, FGFR2, ITGAL, FGFR3, TNF, ADAMTS15, KLRK1, GPRC5B, ITGAM, ADA, HSPA2, TSPAN33, FOLR1, CLEC2D, CD2, FCER1G, CD28, LPL, PTPRC, ITGA4, SLAMF1, CD1D, TIGIT, PROM2, CD209, KLRC4-KLRK1
GO:0001772	Immunological synapse	6.26157	11	1.34804	5.47556e-07	LAT, CD37, CORO1A, CD3E, GZMA, LCK, GZMB, CD53, CD6, RHOH, CD28
GO:0016020	Membrane	6.02448	133	16.299	9.45187e-07	AKNA, ATP1B1, SELENBP1, CD52, B2M, AQP2, CD48, ELOVL1, GNG2, INSR, F11, PIK3CG, GBP5, CD3G, NCF4, DHRS7B, PNPLA4, HLA-DQA1, GLTP, LILRB2, CD38, SIRPG, CD37, ACAP1, VEGFA, YME1L1, VAMP2, AKAP1, UNC13B, ALDOA, FGFR2, ITGAL, ERMP1, LST1, LMNB1, CYSLTR1, ERBB2, MAP4K1, GIPC1, FXYD5, ADA, DOCK2, RAC2, FOLR1, CERS2, STAMBPL1, KIF3B, TBC1D10C, MAP2K3, NCKAP1L, NDC80, CD5L, ITGA4, LAT, CORO1A, P2RX7, TNF…
GO:0072562	Blood microparticle	5.53554	21	2.57353	2.9138e-06	KNG1, IGHG1, IGHG3, IGKV1-17, CD5L, TRDC, IGHM, C1QB, HSPA2, IGHD, IGHV3-23, IGHA1, IGKV4-1, IGHA2, HRG, IGKV2D-28, SLC4A1, IGLV3-25, CP, IGKC, IGLL5
GO:0042101	T cell receptor complex	5.45891	8	0.980392	3.47607e-06	CD3G, CD3D, CD8A, CD3E, CD8B, CD6, APBB1IP, TRAT1
GO:0005576	Extracellular region	5.45813	102	12.5	3.48233e-06	IL16, NELL1, NELL2, CXCL11, IL17RA, B2M, CXCL10, CFP, IFNG, CPA3, IL1B, MUC15, F11, TUB, IL24, LILRB1, C1QB, VEGFA, IGKV4-1, IGLV3-25, MST1L, PLA2G2D, GBP1, FGFR2, ALDOA, CCL3, FGFR3, UMOD, CCL5, CCL4, ICOS, IGHV3-23, IGKC, EGF, LPL, CD5L, EMILIN2, DNASE1, UACA, TNFSF11, S100B, CXCL13, APOL6, XCL1, XCL2, IGHG1, IGHG3, ADGRF1, CD8A, FGF9, IGHV3-48, CD8B, IGKV1-17, GABBR1, FASLG, CCL3L1, AOAH, SERP…
GO:0043020	NADPH oxidase complex	4.19583	6	0.735294	6.37047e-05	CYBB, NCF2, NCF1, NCF4, NCF1C, NCF1B
GO:0042571	Immunoglobulin complex, circulating	4.15386	7	0.857843	7.01683e-05	IGHG1, IGHG3, IGHD, IGHV3-23, TRDC, IGKC, IGLL5
GO:0005615	Extracellular space	4.05189	83	10.1716	8.87372e-05	IGHG1, IGHG3, IL16, FGF9, LY86, FASLG, SELENBP1, IGHM, CXCL11, B2M, CKB, CXCL10, CFP, GPC3, SPX, CCL3L1, SERPINA5, PPP1R1A, CCL3L3, IFNG, MS4A1, IL1B, CPA3, SEMA3B, CAT, MTUS1, GHR, F11, KNG1, GNLY, LYZ, IL24, CTSS, CTSW, SERPINB9, TNFRSF9, LILRB2, TNFSF13B, CST7, VEGFA, VCAN, BIVM, IL12B, CSTA, CA2, ALDOA, CCL3, TNF, ADAMTS15, CXCL9, GPRC5B, CCL5, CCL4, ADA, ITGAM, PRSS8, SIAE, IGHV3-23, IGHA1, …
GO:0005764	Lysosome	3.10095	21	2.57353	0.000792586	ARSD, RNASE2, TMEM9, HCK, KIAA1324, CD1C, CTSS, RRAGD, ADA, CTSW, SIAE, LAPTM5, TOM1L1, CXCR4, GLMP, IL1B, CAT, PCYOX1, TNFAIP3, HLA-DOB, RAB27A
GO:0030669	Clathrin-coated endocytic vesicle membrane	2.9584	8	0.980392	0.00110052	HLA-DQB1, HLA-DQB2, FCGR1A, FCGR1B, HLA-DPA1, SH3GL2, HLA-DQA1, AP2M1
GO:0016323	Basolateral plasma membrane	2.61289	17	2.08333	0.00243845	CLDN8, ATP1B1, ERBB2, UMOD, ATP1A1, CFTR, AQP3, CD1D, AQP2, NOD2, PROM2, CDH16, SLC26A7, FOLR1, RAB17, SLC4A1, CA2
GO:0030658	Transport vesicle membrane	2.42754	7	0.857843	0.0037365	HLA-DQB1, HLA-DQB2, RAB11FIP5, HLA-DPA1, AQP6, HLA-DQA1, AQP2
GO:0046658	Anchored component of plasma membrane	2.33302	6	0.735294	0.00464497	CD48, PRSS8, GPC3, FOLR1, CD2, CD160
GO:0010008	Endosome membrane	2.11725	16	1.96078	0.00763398	HLA-DQB1, HLA-DQB2, ERBB2, SLA2, NCF4, CD1C, HLA-DQA1, TLR8, CD1D, TOM1L1, HLA-DPA1, ATP6V0A4, INSR, ATP6V0D2, HLA-DOB, CLCN5
GO:0016023	Cytoplasmic, membrane-bounded vesicle	2.02026	13	1.59314	0.00954416	FGFR2, EBP, PRF1, SLA2, RGS19, FASLG, GIPC1, WLS, ARHGAP30, CXCR4, TRAF7, WASL, WIPF1

## Sheet: Suppl.5
Results of pathway analysis
ID	Term	-LOG(P)	Count	%	PValue	Genes
hsa04060	Cytokine-cytokine receptor interaction	13.2009	43	5.26961	6.29658e-14	CCL3, TNF, IL21R, CXCL9, FASLG, CXCR3, IL7R, CCL5, CXCL11, CCL4, IL17RA, CXCL10, ACVR1B, IL12RB1, CXCR4, CCL3L1, IL10RA, CCL3L3, CXCR6, IFNG, CSF2RB, IL1B, IL2RG, EGF, CSF2RA, CD27, GHR, IL2RB, FLT1, IL18RAP, IL2RA, TNFRSF17, TNFSF8, TNFRSF9, CCR7, TNFSF11, TNFSF13B, CCR5, CXCL13, CCR2, VEGFA, IL12B, BMPR1B
hsa04640	Hematopoietic cell lineage	8.48192	21	2.57353	3.29669e-09	TNF, IL2RA, CD3G, CD8A, CD3D, CD8B, CD3E, CD1C, ITGA4, IL7R, ITGAM, CD1E, CD1D, CD37, CD44, FCGR1A, CD33, MS4A1, CD2, IL1B, CSF2RA
hsa04650	Natural killer cell mediated cytotoxicity	8.38007	25	3.06373	4.16801e-09	PIK3CG, PRF1, ITGAL, CD244, TNF, KLRK1, FASLG, GZMB, VAV1, PRKCB, HCST, CD48, LAT, SH2D1A, RAC2, LCK, IFNG, KLRC4-KLRK1, FCER1G, PIK3R5, FCGR3A, NFATC2, FCGR3B, KLRD1, LCP2
hsa04062	Chemokine signaling pathway	8.1784	31	3.79902	6.63129e-09	CCL3, ADCY7, CXCL9, CXCR3, CXCL11, CCL5, CCL4, CXCL10, DOCK2, RAC2, CXCR4, CCL3L1, CCL3L3, CXCR6, GNG2, PIK3R5, PIK3CG, ITK, NCF1, HCK, STAT1, VAV1, WAS, CCL18, CCR7, CCR5, CXCL13, CCR2, WASL, XCL1, XCL2
hsa05340	Primary immunodeficiency	7.4378	13	1.59314	3.64926e-08	PTPRC, CD8A, CD3D, CD8B, CD3E, IL7R, ADA, BTK, ICOS, TAP2, LCK, IL2RG, CD79A
hsa04514	Cell adhesion molecules (CAMs)	7.03621	25	3.06373	9.19999e-08	HLA-DQB1, CLDN8, PTPRC, ITGAL, CD8A, CD8B, SELL, CTLA4, ITGA4, HLA-DQA1, SDC2, ITGAM, TIGIT, SIGLEC1, SDC1, CD86, ICOS, CD2, HLA-DPA1, ESAM, VCAN, CD6, HLA-DOB, SELPLG, CD28
hsa05332	Graft-versus-host disease	6.56911	12	1.47059	2.69709e-07	HLA-DQB1, PRF1, CD86, TNF, IFNG, IL1B, FASLG, GZMB, HLA-DPA1, HLA-DOB, HLA-DQA1, CD28
hsa04380	Osteoclast differentiation	6.4435	23	2.81863	3.60167e-07	PIK3CG, TNF, NCF2, NCF1, NCF4, STAT1, BTK, LILRB1, LILRB2, SIRPG, CYBB, LILRA1, TNFSF11, FCGR1A, LILRA4, LCK, IFNG, IL1B, PIK3R5, FCGR3A, NFATC2, FCGR3B, LCP2
hsa05330	Allograft rejection	6.00164	12	1.47059	9.96239e-07	HLA-DQB1, PRF1, CD86, TNF, IFNG, FASLG, GZMB, HLA-DPA1, IL12B, HLA-DOB, HLA-DQA1, CD28
hsa05150	Staphylococcus aureus infection	5.82633	14	1.71569	1.49166e-06	HLA-DQB1, ITGAL, FPR3, ITGAM, HLA-DQA1, C1QB, FCGR1A, HLA-DPA1, C2, FCGR3A, SELPLG, HLA-DOB, FCGR3B, PTAFR
hsa04960	Aldosterone-regulated sodium reabsorption	5.74815	12	1.47059	1.78589e-06	PIK3CG, ATP1B1, HSD11B2, ATP1A1, PIK3R5, NEDD4L, SCNN1G, SCNN1B, IRS1, INSR, PRKCB, KCNJ1
hsa04660	T cell receptor signaling pathway	5.62758	19	2.32843	2.35735e-06	PIK3CG, PTPRC, ITK, TNF, CD3G, CD3D, CD8A, CD8B, CD3E, CTLA4, VAV1, LAT, ICOS, LCK, IFNG, PIK3R5, NFATC2, CD28, LCP2
hsa04612	Antigen processing and presentation	5.45937	16	1.96078	3.47243e-06	HLA-DQB1, KLRC2, TNF, KLRC3, CD8A, CD8B, CTSS, HLA-DQA1, B2M, HSPA2, TAP2, IFNG, HLA-DPA1, KLRD1, HLA-DOB, KLRC1
hsa04620	Toll-like receptor signaling pathway	4.82736	18	2.20588	1.48813e-05	PIK3CG, CCL3, TNF, TOLLIP, MAP2K3, CXCL9, CXCL11, STAT1, CCL5, CCL4, TLR8, CXCL10, CD86, CCL3L1, CCL3L3, IL1B, PIK3R5, IL12B
hsa04145	Phagosome	4.73983	22	2.69608	1.82042e-05	HLA-DQB1, NCF2, NCF1, TUBB2A, NCF4, CTSS, ITGAM, HLA-DQA1, ATP6V1C2, CORO1A, CYBB, FCGR1A, CD209, TAP2, HLA-DPA1, CLEC7A, ATP6V1G3, FCGR3A, ATP6V0A4, FCGR3B, HLA-DOB, ATP6V0D2
hsa04666	Fc gamma R-mediated phagocytosis	4.26161	15	1.83824	5.47504e-05	PIK3CG, PTPRC, NCF1, HCK, WAS, VAV1, PLPP3, PRKCB, LAT, DOCK2, RAC2, FCGR1A, SCIN, PIK3R5, WASL
hsa04670	Leukocyte transendothelial migration	4.2089	18	2.20588	6.18165e-05	CLDN8, PIK3CG, ITGAL, ITK, NCF2, NCF1, NCF4, ITGA4, VAV1, ITGAM, PRKCB, RASSF5, CYBB, RAC2, CXCR4, PIK3R5, ESAM, RHOH
hsa04672	Intestinal immune network for IgA production	4.11019	11	1.34804	7.7591e-05	HLA-DQB1, CD86, TNFSF13B, CXCR4, ICOS, TNFRSF17, HLA-DPA1, ITGA4, HLA-DOB, HLA-DQA1, CD28
hsa05320	Autoimmune thyroid disease	3.04959	10	1.22549	0.000892089	HLA-DQB1, PRF1, CD86, CTLA4, FASLG, GZMB, HLA-DPA1, HLA-DOB, HLA-DQA1, CD28
hsa04015	Rap1 signaling pathway	2.80188	22	2.69608	0.00157803	FYB, FGFR2, PIK3CG, ITGAL, PARD6B, FLT1, FGFR3, ADCY7, FGF9, MAP2K3, APBB1IP, ITGAM, PRKCB, LAT, RASSF5, RAC2, ID1, VEGFA, PIK3R5, EGF, INSR, LCP2
hsa04966	Collecting duct acid secretion	2.76492	7	0.857843	0.00171823	ATP6V1C2, CLCNKB, SLC4A1, CA2, ATP6V1G3, ATP6V0A4, ATP6V0D2
hsa04664	Fc epsilon RI signaling pathway	2.76249	11	1.34804	0.00172787	PIK3CG, LAT, TNF, RAC2, MAP2K3, FCER1G, PIK3R5, VAV1, PRKCB, BTK, LCP2
hsa04630	Jak-STAT signaling pathway	2.68507	17	2.08333	0.00206504	PIK3CG, IL2RB, IL2RA, IL21R, IL24, IL7R, STAT1, STAT4, IL12RB1, IL10RA, IFNG, CSF2RB, PIK3R5, IL2RG, IL12B, CSF2RA, GHR
